# Supplementary material for: A fully electrically driven hydrogen direct reduction process for zero-carbon green steel production
Source: Royal Society of Chemistry journal article supplement (doi:10.1039/d5gc00279f), 2025-01-01
Supplement: d5gc00279f1.pdf [file d5gc00279f1.pdf]

## **Supplementary Section**

# **Fully Electric Hydrogen-Driven Direct Reduction Process for Zero-Carbon Green Steel Production**

*Zeng Liang<sup>1</sup>, Jianliang Zhang<sup>1\*</sup>, Kejiang Li<sup>1\*</sup>, Lei Shao<sup>2</sup>, Zhengjian Liu<sup>1</sup>,  
Zonghao Yang<sup>1</sup>, Chunhe Jiang<sup>3</sup>, Shan Ren<sup>4</sup>, Alberto N. Conejo<sup>1</sup>*

<sup>1</sup> School of Metallurgical and Ecological Engineering, University of Science and Technology Beijing, Beijing 100083, P.R. China.

<sup>2</sup> School of Metallurgy, Northeastern University, Shenyang 110819, China

<sup>3</sup> Technical Support Center for Prevention and Control of Disastrous Accidents in Metal Smelting, University of Science and Technology Beijing, Beijing 100083, China

<sup>4</sup> State Key Laboratory of Multiphase Flow in Power Engineering, School of Energy and Power Engineering, Xi'an Jiaotong University, Xi'an 710049, Shaanxi, P.R. China

**\*Corresponding author:** Jianliang Zhang (zhang.jianliang@hotmail.com) and Kejiang Li (likejiang@ustb.edu.cn)

**Address:** 30 Xueyuan Rd., Haidian District, Beijing 100083, PR China.

**This PDF file includes:**

**Figs. S1 to S4**

**Table. S1, S2 and S3**

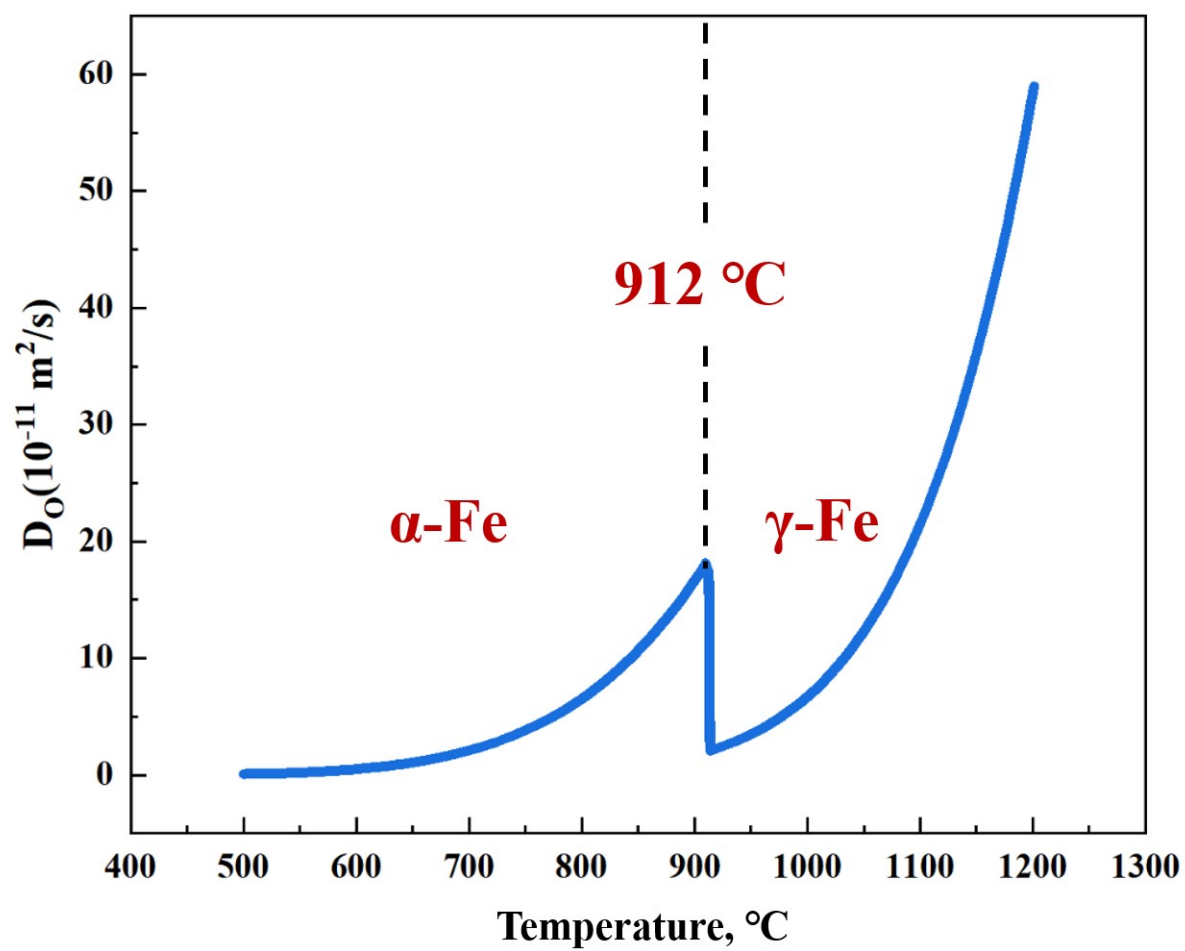

Fig. S1. Evolution of Diffusion Coefficients Due to Iron Phase Changes

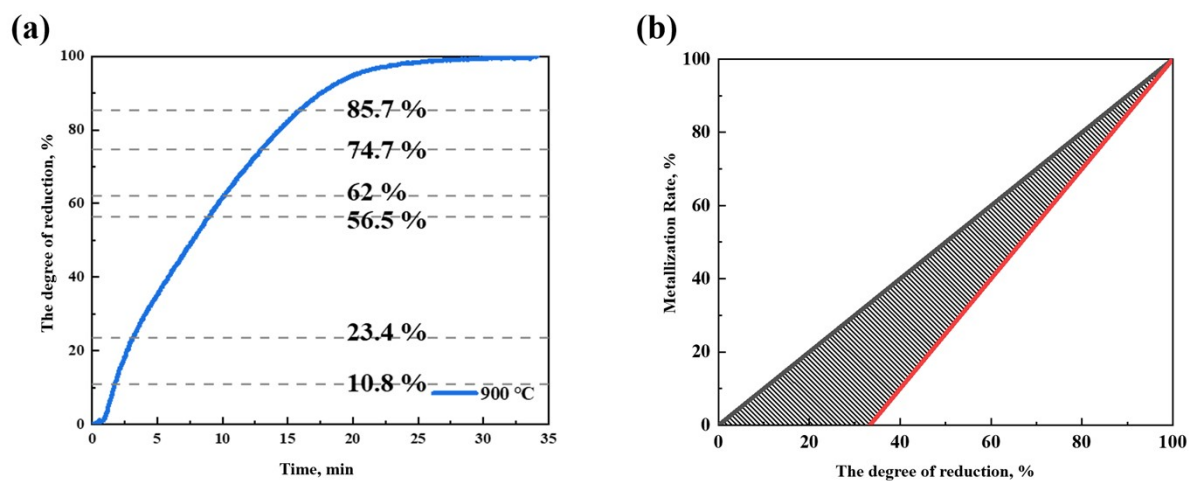

**Fig. S2.** (a) Sampling at Different Degrees of Reduction for Induction Heating Comparison;

(b) Approximate Relationship Between Degree of Reduction and Metallization Rate

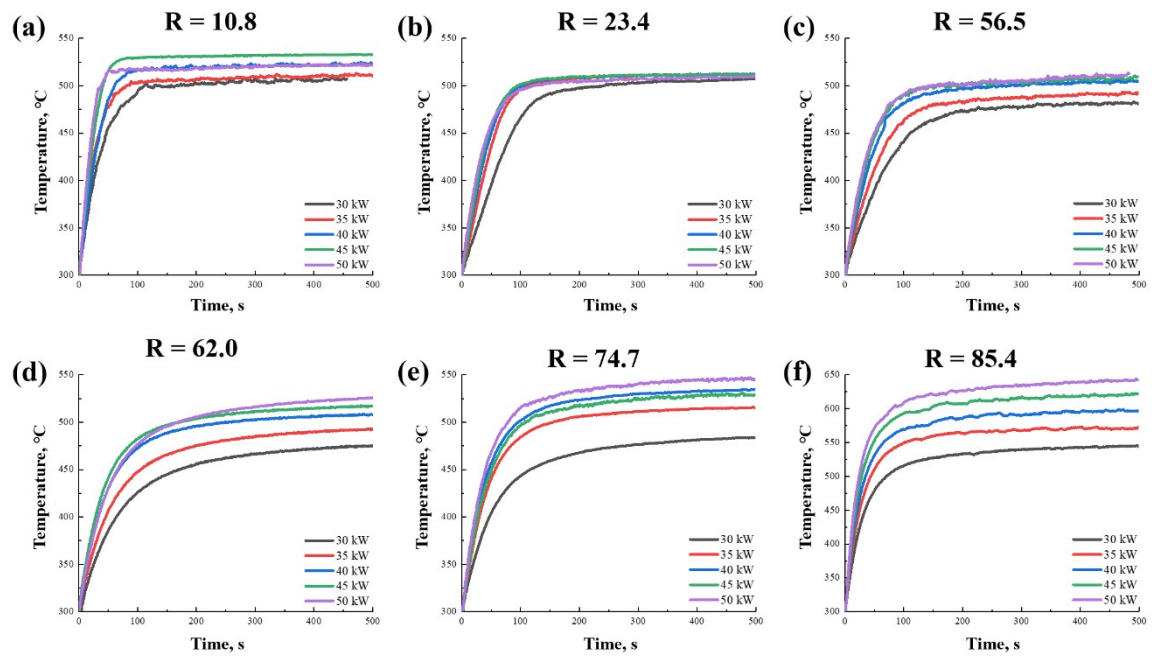

**Fig. S3.** Temporal Evolution of Induction Heating Temperature for Samples at Different Reduction Degrees: (a) 10.8%; (b) 23.4%; (c) 56.5%; (d) 62.0%; (e) 74.7%; (f) 85.4%

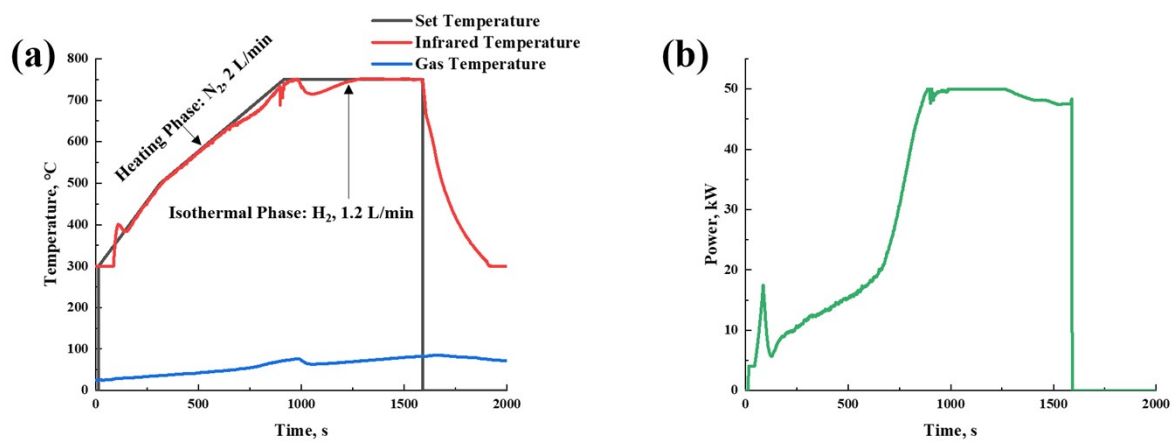

**Fig. S4.** (a) Temperature and Gas Control during Induction Heating-Hydrogen Reduction Experiments; (b) Variation of Equipment Power

**Table S1.** Temperature and Gas Flow Control Scheme for Hydrogen Reduction Experiments

| No. | Temperature (°C) | Gas Flow Rate (L/min) |
|-----|------------------|-----------------------|
| 1   | 850              | 0.5                   |
| 2   | 850              | 1                     |
| 3   | 850              | 1.5                   |
| 4   | 850              | 2                     |
| 5   | 850              | 3                     |
| 6   | 800              | 1.5                   |
| 7   | 900              | 1.5                   |
| 8   | 950              | 1.5                   |
| 9   | 1000             | 1.5                   |

**Table S2.** Initial Mass, Reaction Time, Final Mass, and Weight Loss of Samples in Induction Heating-Hydrogen Reduction Experiments

| No. | Temperature (°C) | Initial Weight (g) | Reaction Time (min) | Final Weight (g) | Weight Loss (g) | Weight Loss Rate (%) | Degree of Reduction (%) |
|-----|------------------|--------------------|---------------------|------------------|-----------------|----------------------|-------------------------|
| 1   | 750              | 7.589              | 5                   | 7.075            | 0.514           | 0.06773              | 0.2479                  |
| 2   | 750              | 7.619              | 10                  | 6.798            | 0.821           | 0.107757             | 0.3967                  |
| 3   | 750              | 7.547              | 15                  | 6.381            | 1.166           | 0.154498             | 0.5684                  |
| 4   | 750              | 7.252              | 20                  | 5.547            | 1.705           | 0.235108             | 0.8645                  |
| 5   | 750              | 7.075              | 40                  | 5.227            | 1.848           | 0.261201             | 0.9604                  |
| 6   | 700              | 7.423              | 5                   | 7.132            | 0.291           | 0.039202             | 0.1449                  |
| 7   | 700              | 7.610              | 10                  | 6.865            | 0.745           | 0.097898             | 0.3605                  |
| 8   | 700              | 7.369              | 15                  | 6.465            | 0.904           | 0.122676             | 0.4515                  |
| 9   | 700              | 7.4171             | 20                  | 6.086            | 1.3311          | 0.179464             | 0.5567                  |
| 10  | 700              | 7.664              | 40                  | 5.976            | 1.688           | 0.220251             | 0.8099                  |
| 11  | 650              | 7.398              | 5                   | 7.293            | 0.105           | 0.014193             | 0.053                   |
| 12  | 650              | 7.597              | 10                  | 7.297            | 0.3             | 0.039489             | 0.1474                  |
| 13  | 650              | 7.382              | 15                  | 7.035            | 0.347           | 0.047006             | 0.1736                  |
| 14  | 650              | 7.309              | 20                  | 6.721            | 0.588           | 0.080449             | 0.2964                  |
| 15  | 650              | 7.113              | 40                  | 6.177            | 0.936           | 0.131590             | 0.4843                  |

**Table S3 Comparative Analysis of CO<sub>2</sub> Emissions, Renewable Energy Utilization, and Hazard Risks Across Direct Reduction Ironmaking Processes**

| <b>Green Chemistry Metric</b>      | <b>IH-DR</b>                | <b>H<sub>2</sub>-DR</b>       | <b>MIDREX</b>       |
|------------------------------------|-----------------------------|-------------------------------|---------------------|
| CO <sub>2</sub> Emissions (t/t Fe) | 0.05                        | 0.05                          | 0.45-0.90           |
| Energy Source                      | 100% Renewable              | 90-94% Renewable              | 13-17% Renewable    |
| Hazard Risk                        | Low (300°C H <sub>2</sub> ) | High (1050°C H <sub>2</sub> ) | Moderate (900°C NG) |
